# Supplementary material
Source: publisher site journal article supplement (https://www.dovepress.com/get_supplementary_file.php?f=235664T1.docx)
Supplement: Supplementary file 1 [file get_supplementary_file.php]

**Table S1. Primer used for qRT-PCR.**

| **ID** | **Primer** | |
| --- | --- | --- |
| **Forward(5'-3')** | **Reverse(5'-3')** |
| hsa_circ_0072088 | TCCGTATCCTGATCCTTCCCAGT | CGCCAGAGAATCCAGAACCACAT |
| hsa_circ_0082564 | TTTACTTCCTTGGAGCCAGAGC | CAAACATTATTCTCCGCAGCAT |
| hsa_circ_0008274 | CCTGTCCTCCTAAACCTCCAAG | TCGCTGACCAAGAACTGAATAG |
| hsa_circ_0000519 | CTACCCTGCTGAACCTGAAACA | TCACACTCCTCCTTGGTCTTGG |
| hsa_circ_0003528 | GTTTGAGAAGGAAAATGACCCA | GTTTCTCAATCTCAGCATAGCACT |
